# Supplementary material
Source: PubMed Central journal article supplement (PMC3392427)
Supplement: NIHMS378646-supplement-1.pdf [file NIHMS378646-supplement-1.pdf]

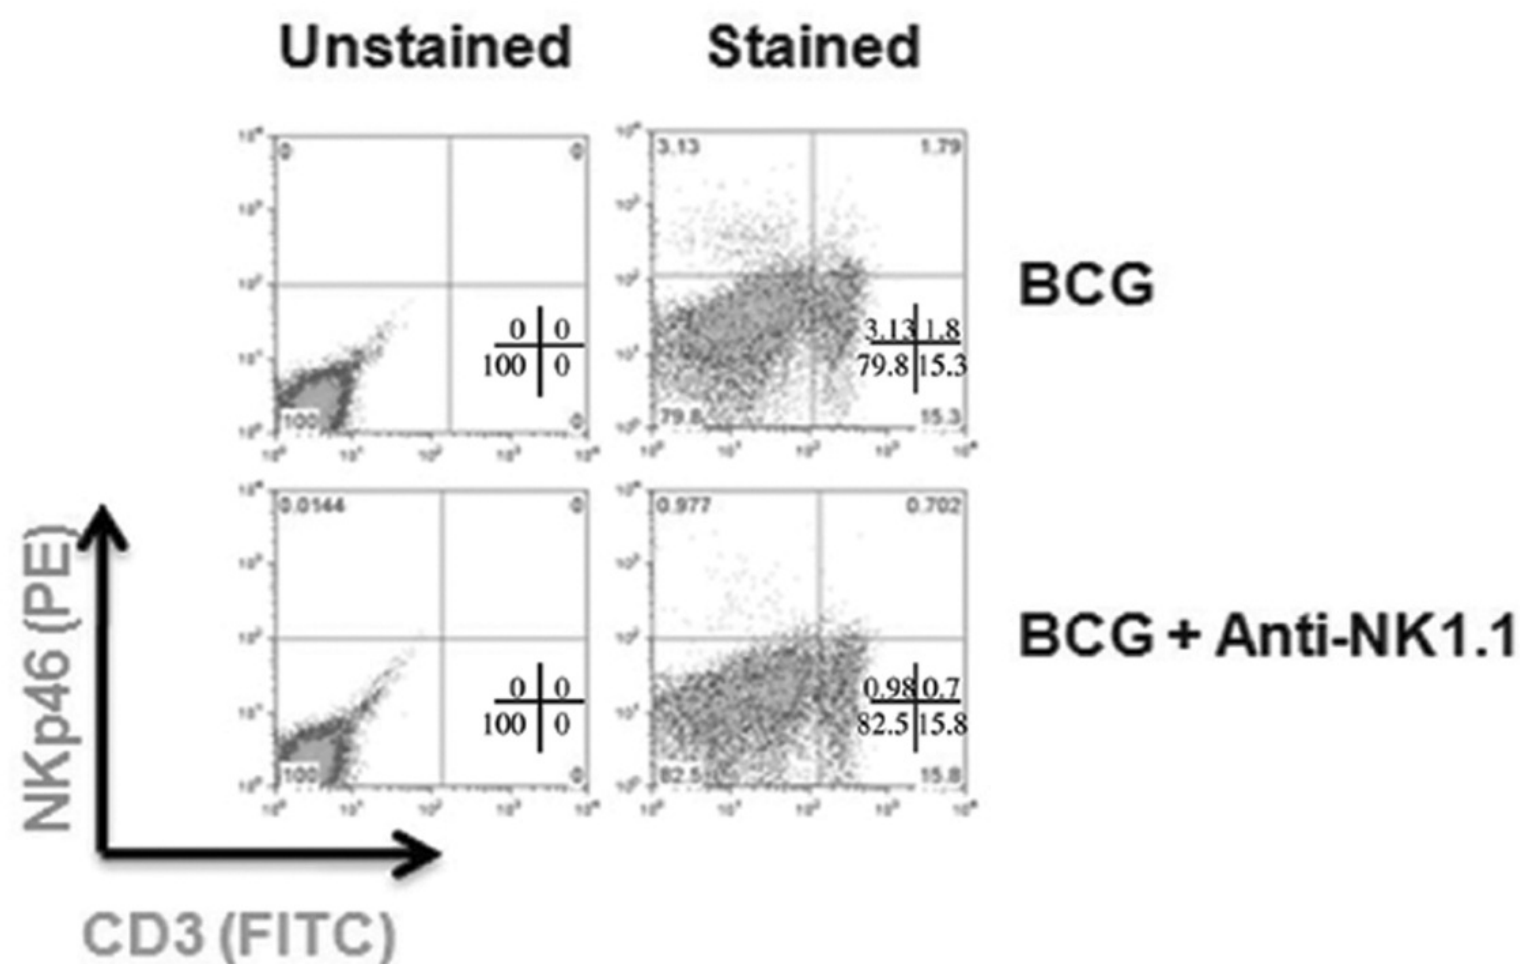

Supplemental Fig. 1

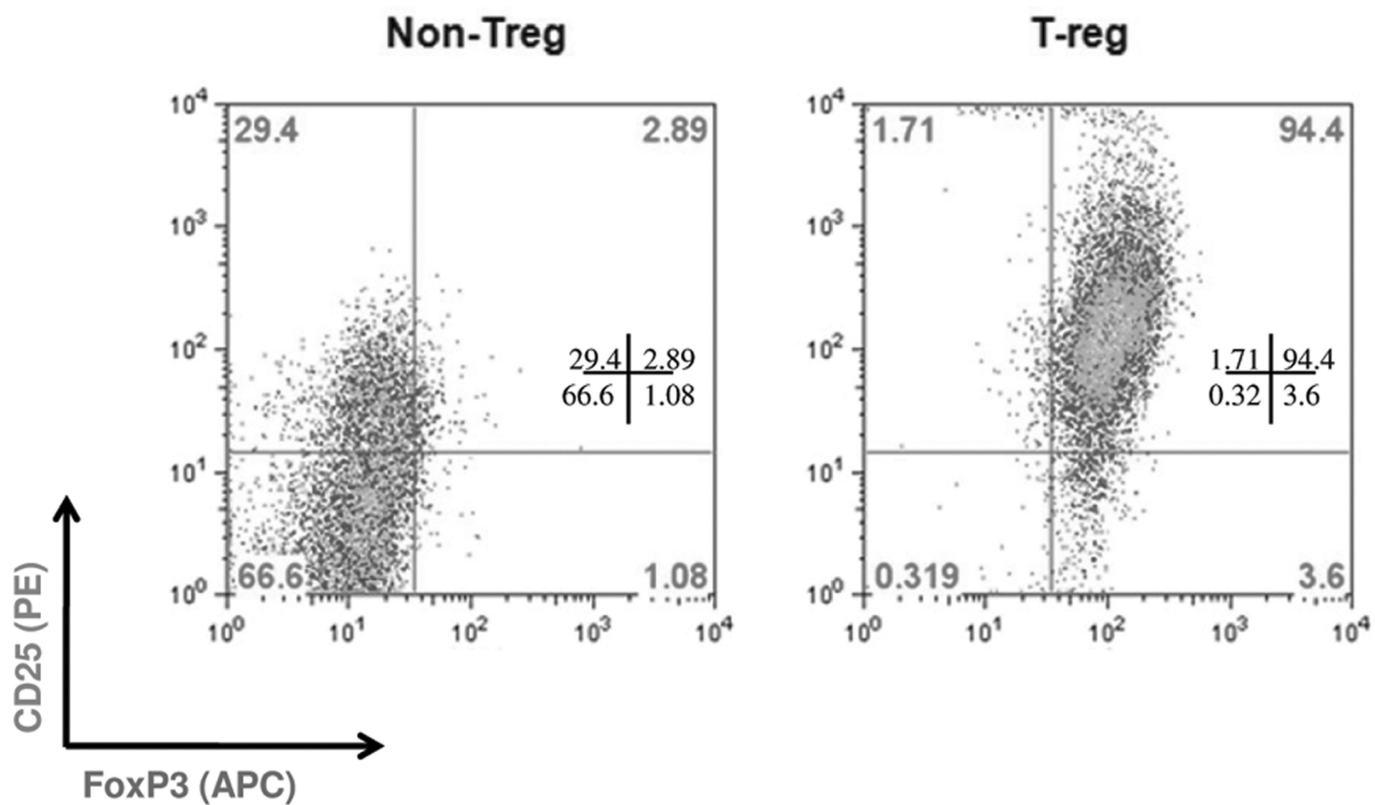

**Supplemental Fig. 2A**

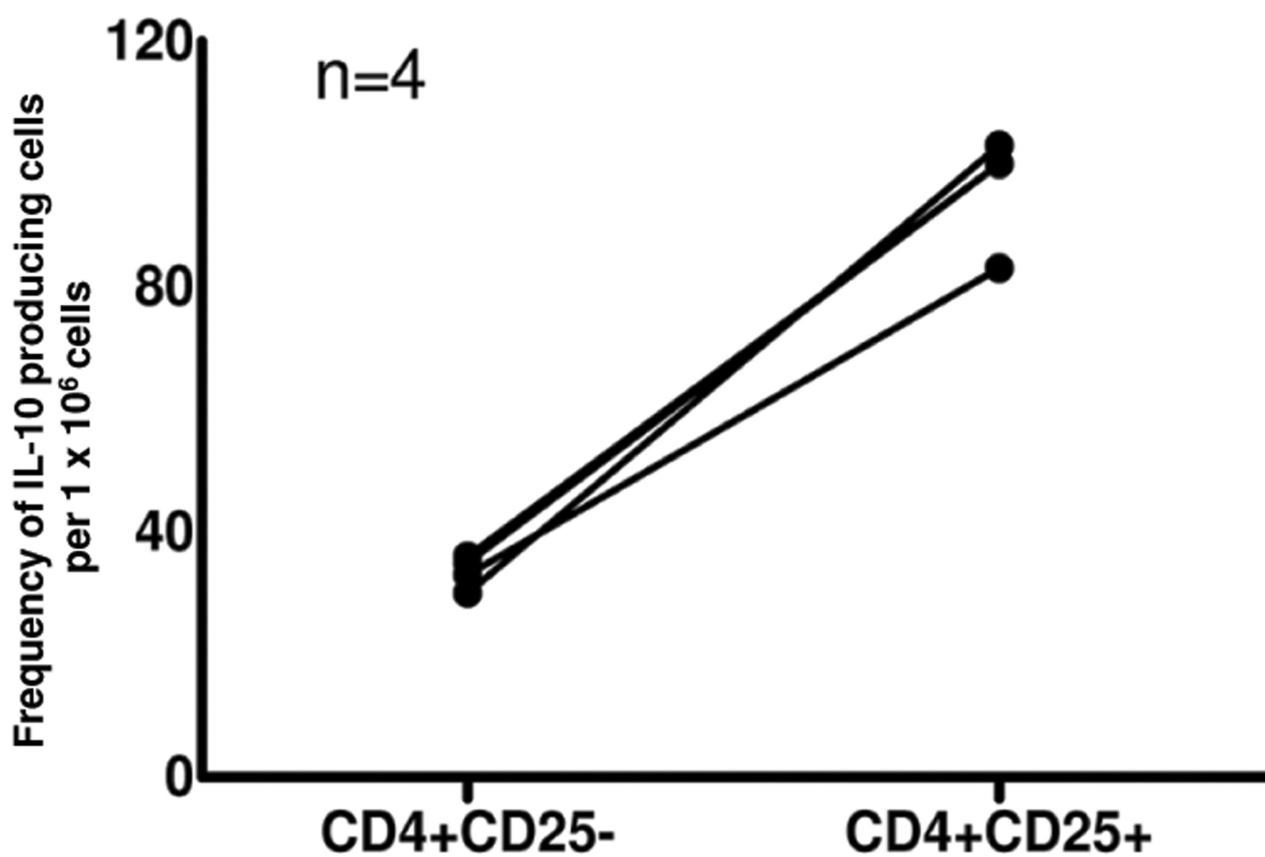

**Supplemental Fig. 2B**

### Supplemental figure legends

**Supplemental Fig. 1.** Anti-NK1.1 depletes mice of NK and NKT cells. Mice were given 0.3 mg of anti-NK1.1 or isotype control Ab by tail vein injection on days 0, 1 and 2, relative to administration of BCG. After 72 h, spleen and peripheral lymph node cells were isolated, and CD3<sup>+</sup> and NKp46<sup>+</sup> cells were measured by flow cytometry. Four mice were used for each group. A representative flow cytometry result of spleen cells is shown.

**Supplemental Fig. 2. A.** FoxP3 expression by CD4<sup>+</sup>CD25<sup>hi</sup> and CD4<sup>+</sup>CD25<sup>-</sup> cells. C57BL/6 mice were immunized subcutaneously with 10<sup>6</sup> CFU of BCG. After 72 h, CD4<sup>+</sup>CD25<sup>hi</sup> cells were isolated from pooled spleen and lymph node cells, using the Treg isolation kit. Purified cells were stained with Abs to CD4 and CD25, and intracellular staining was performed with anti-FoxP3. The experiment was performed three times. A representative flow cytometry result is shown. **B.** Frequency of IL-10-producing CD4<sup>+</sup>CD25<sup>hi</sup> and CD4<sup>+</sup>CD25<sup>-</sup> cells. The above purified CD4<sup>+</sup>CD25<sup>hi</sup> and CD4<sup>+</sup>CD25<sup>-</sup> cells were placed on an ELISPOT plate. Following overnight incubation, the frequency of IL-10-producing cells was determined, using ELISPOT kits (Biolegend). Four mice were used.
